# Supplementary material for: Single cell transcriptomic analysis of human mesenchymal stem cells reveals limited heterogeneity
Source: PubMed Central journal article supplement (PMC6506509; doi:10.1038/s41419-019-1583-4), 2019-05-08
Supplement: 41419_2019_1583_MOESM1_ESM.pdf [file 41419_2019_1583_MOESM1_ESM.pdf]

# Figure S1

**A**

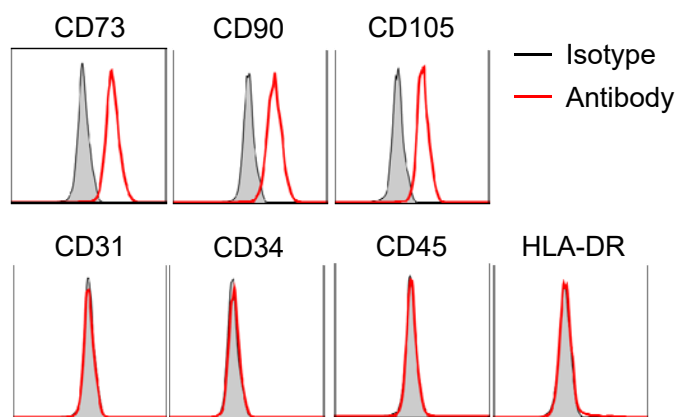

# Figure S2

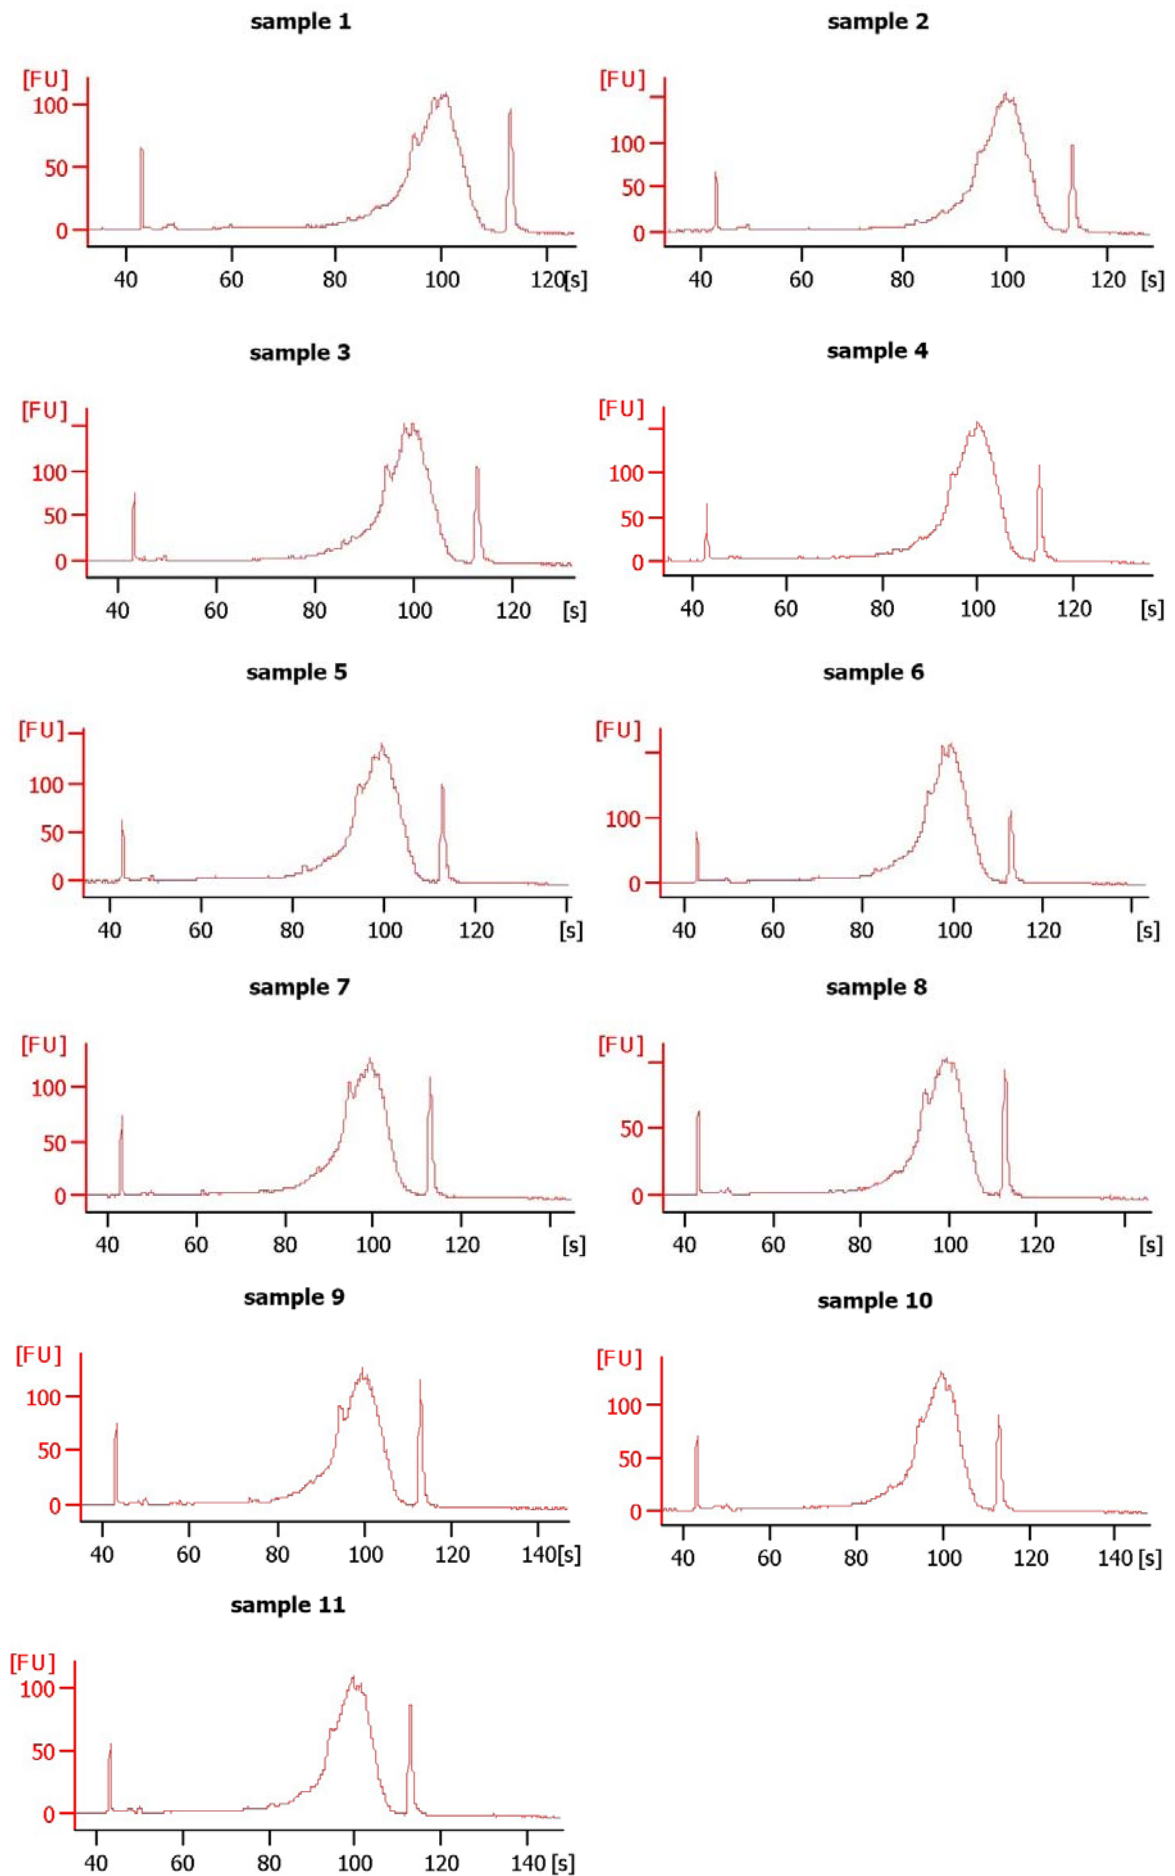

Figure S3

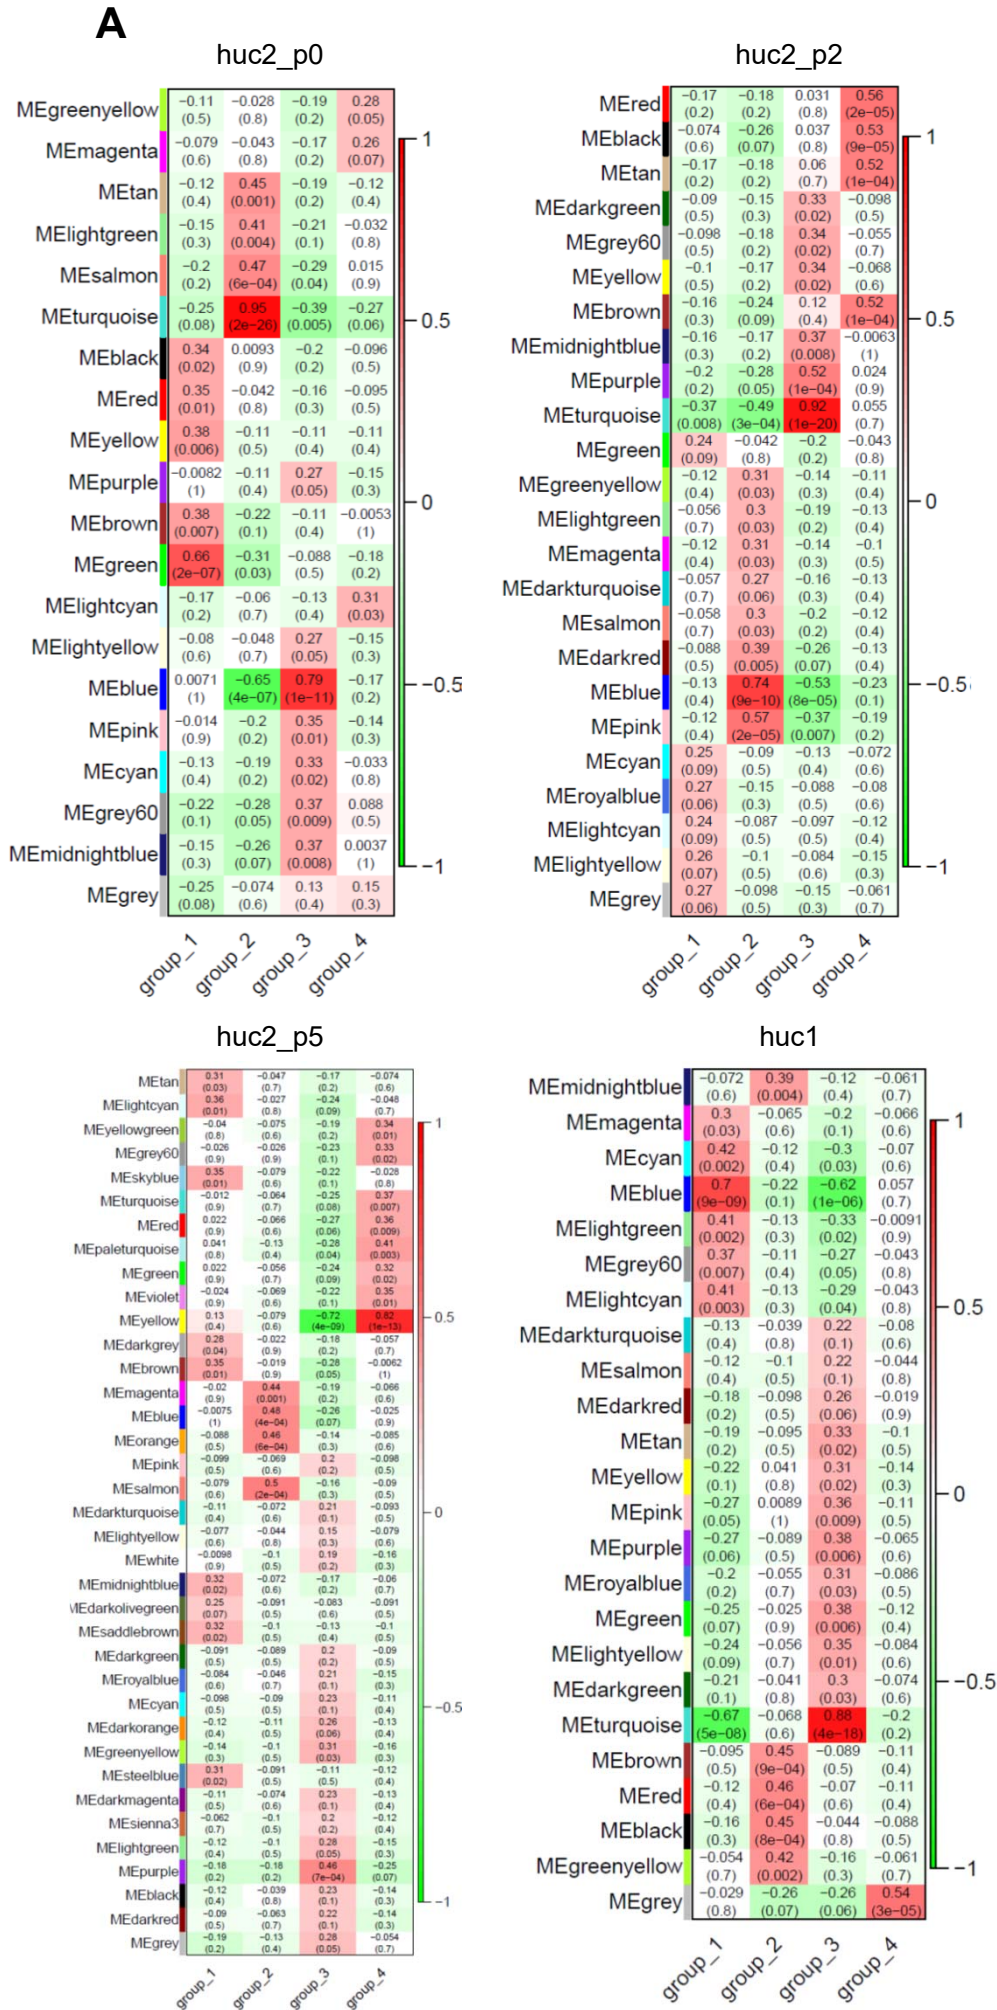

# Figure S4

## A

blue module

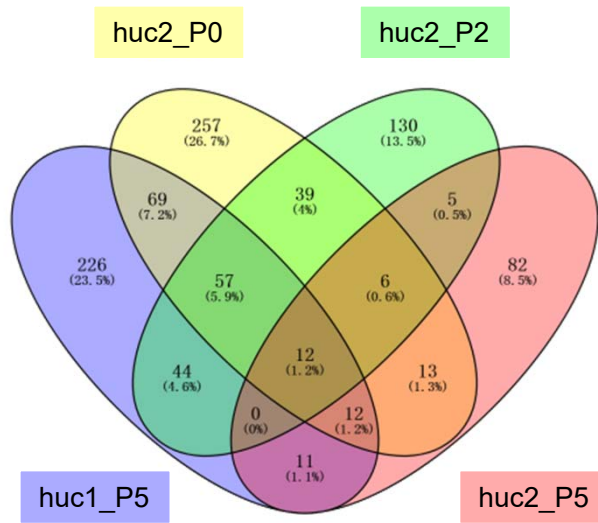

turquoise module

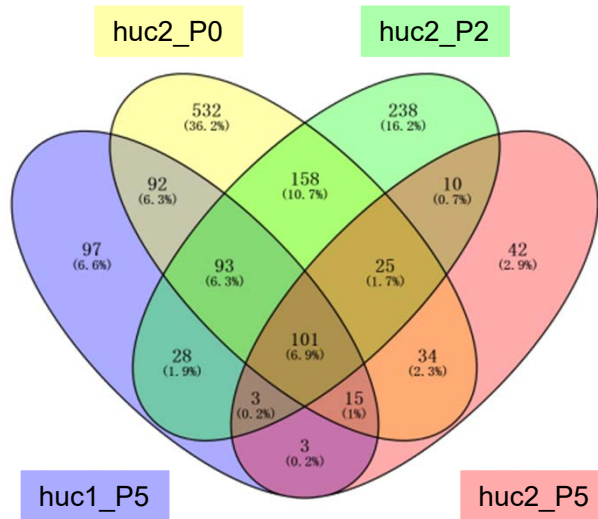

**Figure S5**

**A**

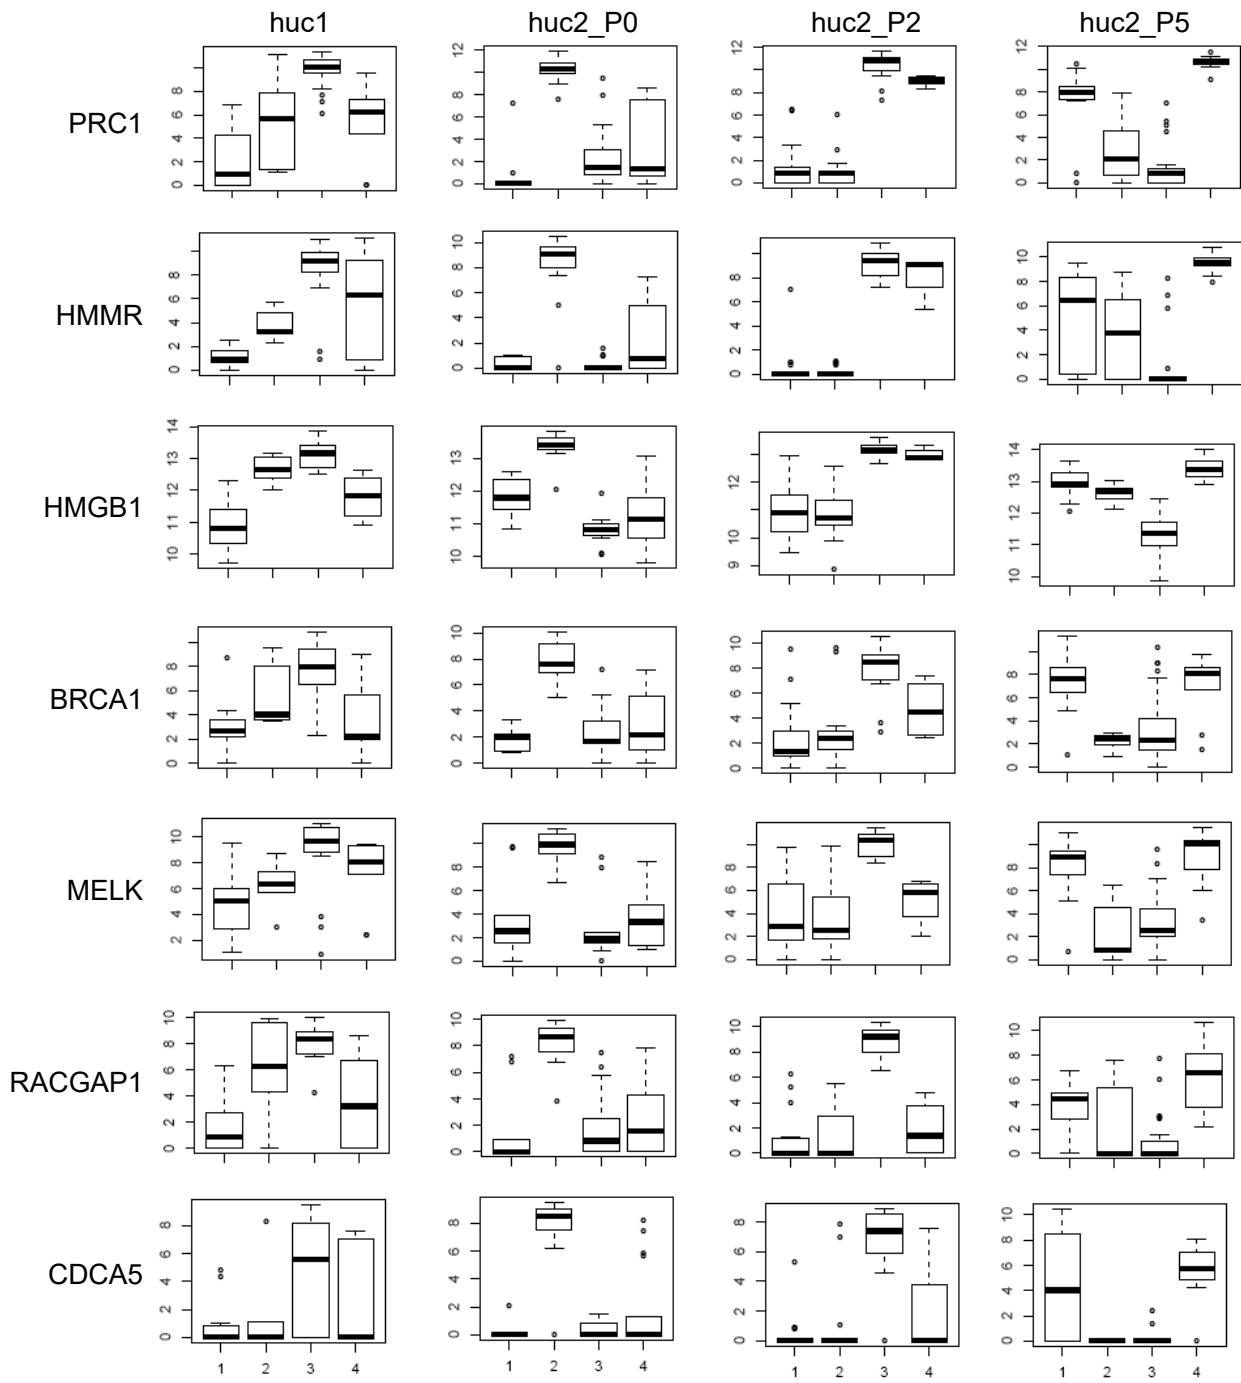

Figure S6

A

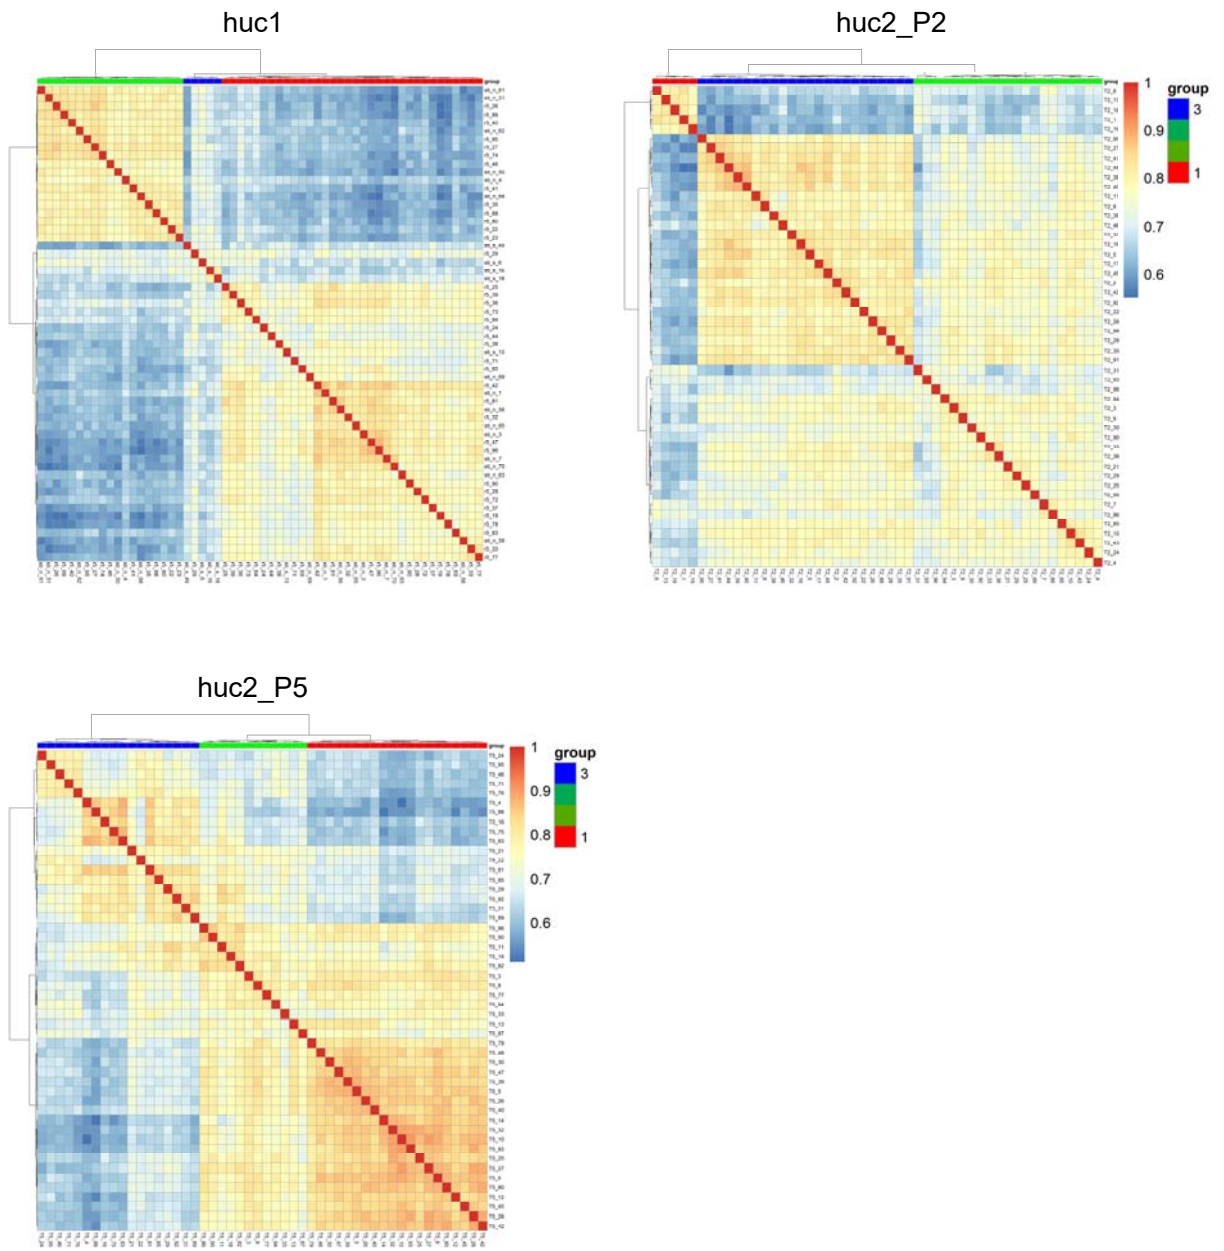

# Figure S7

**A**

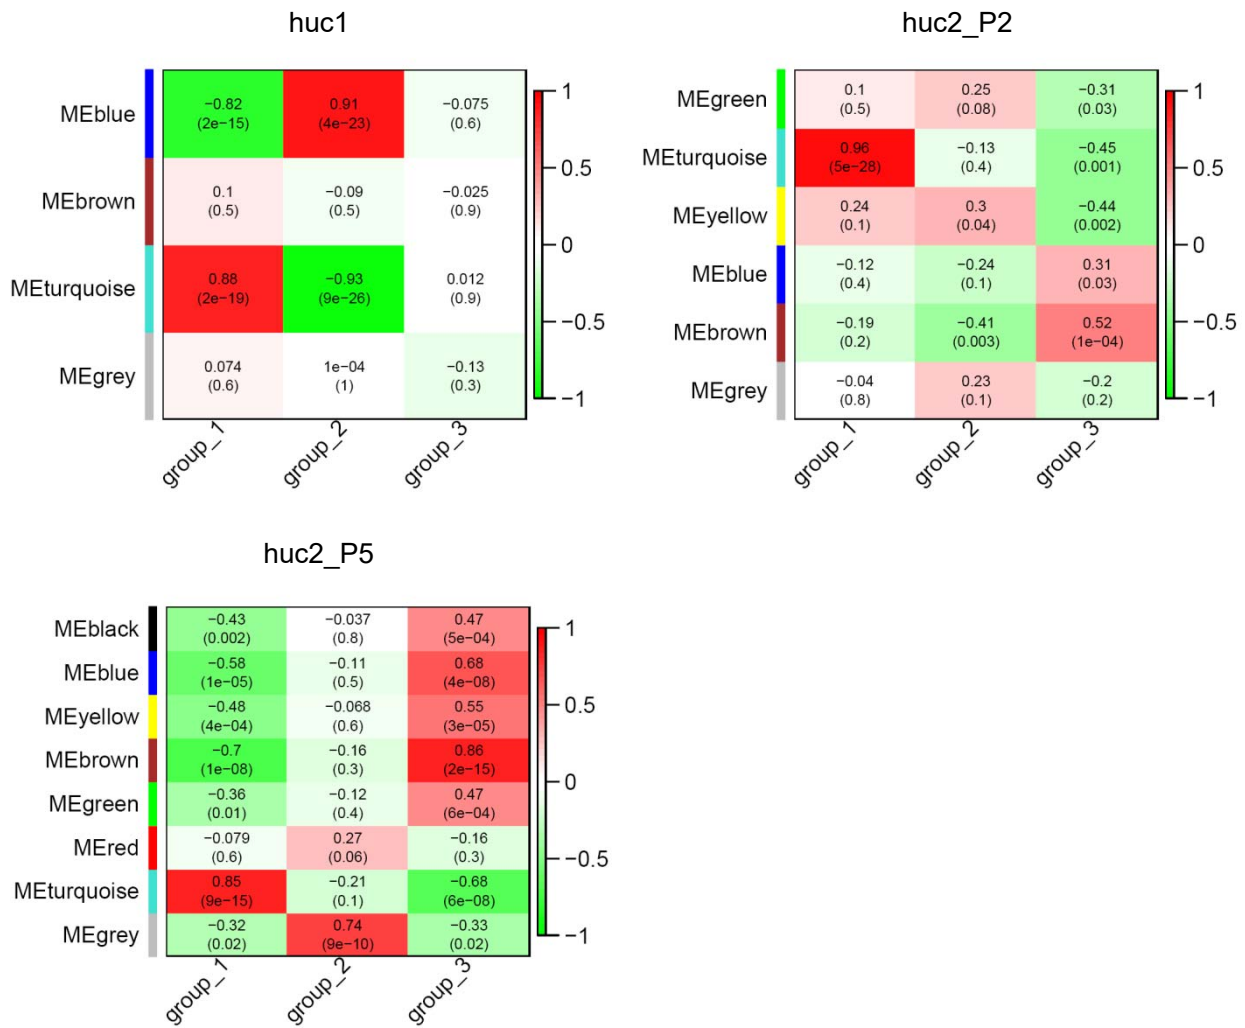





**Figure S9**

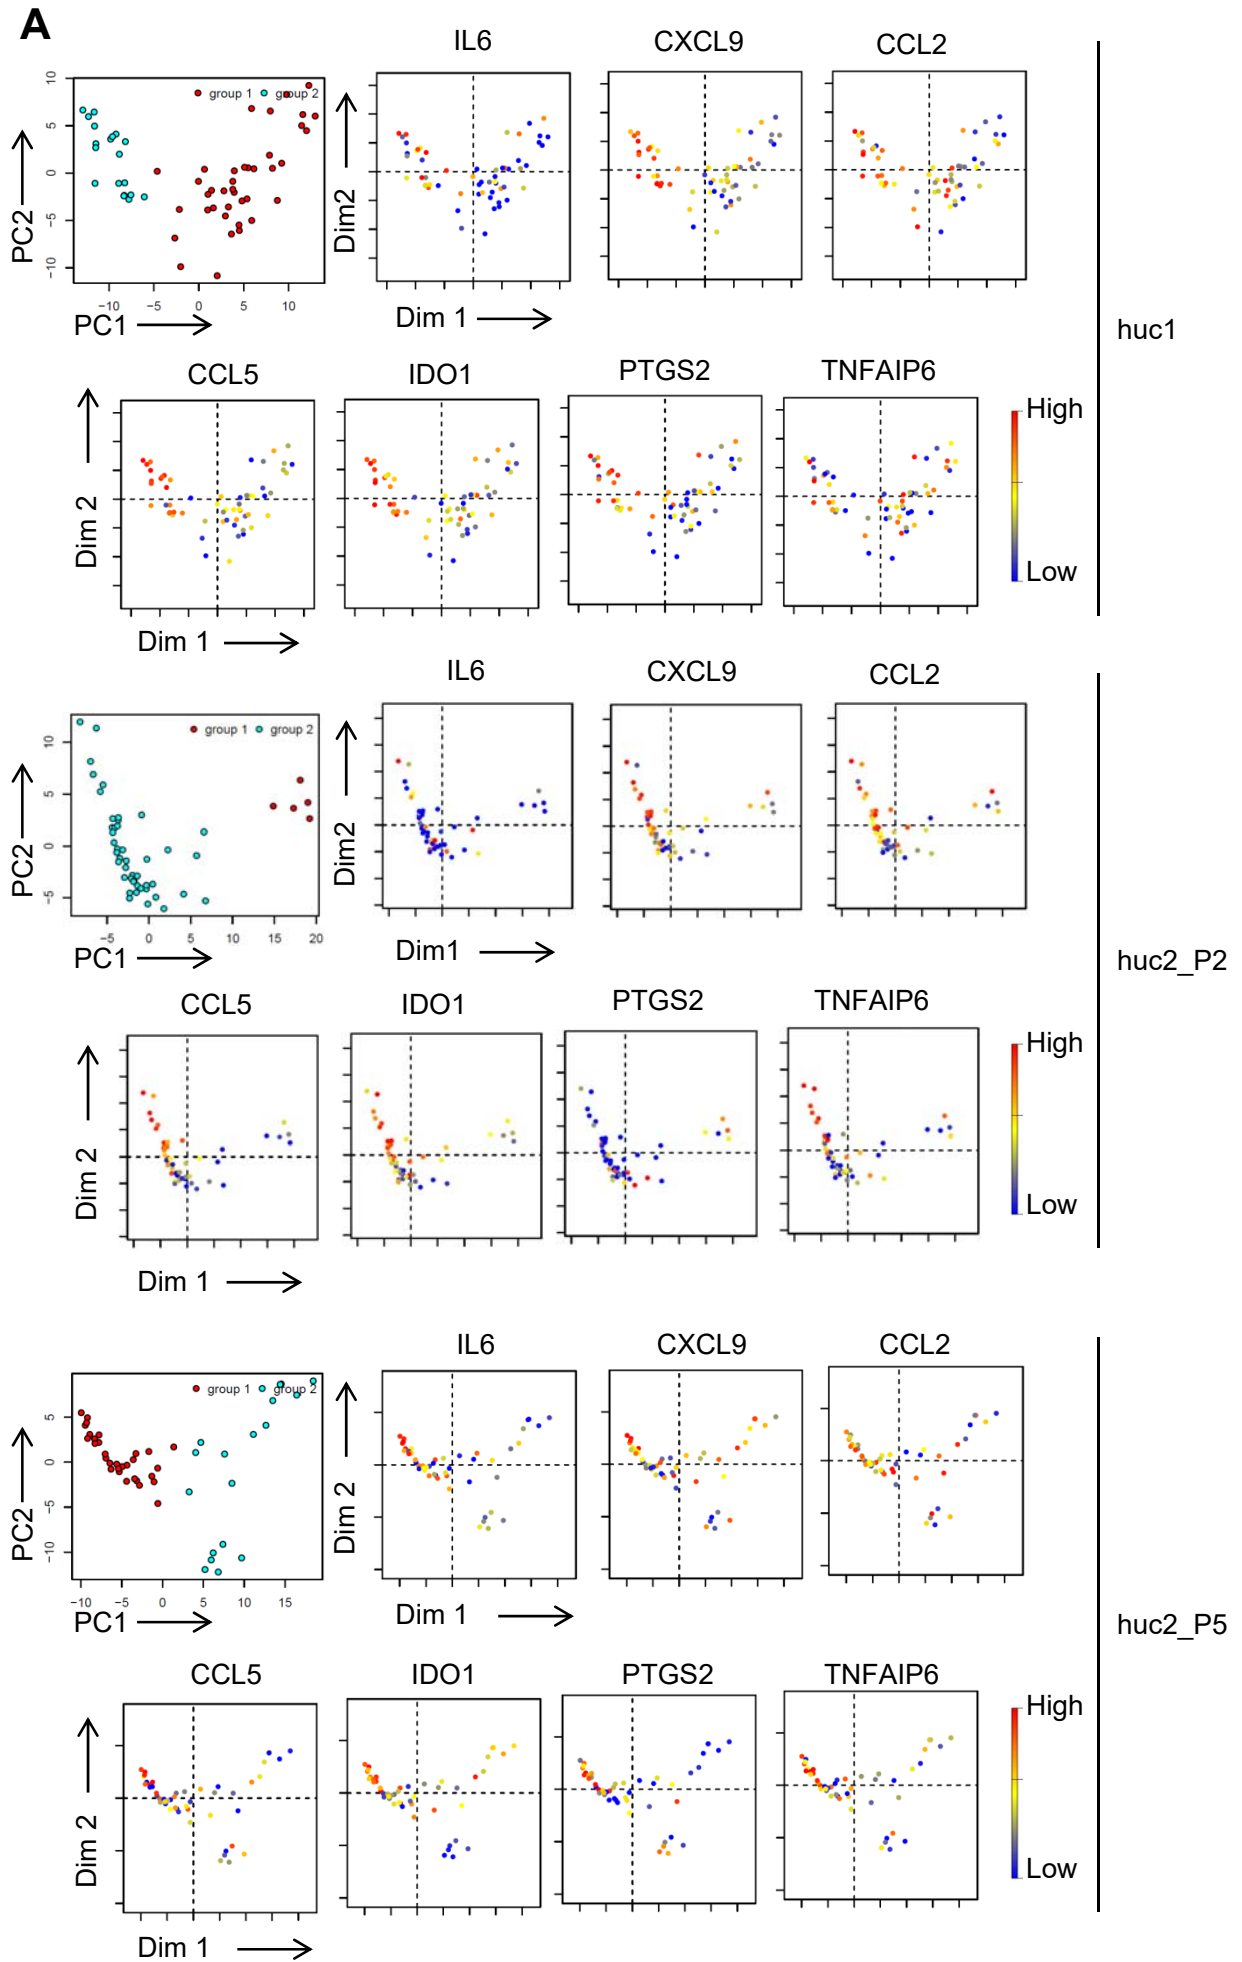

**Figure S10**

**A**

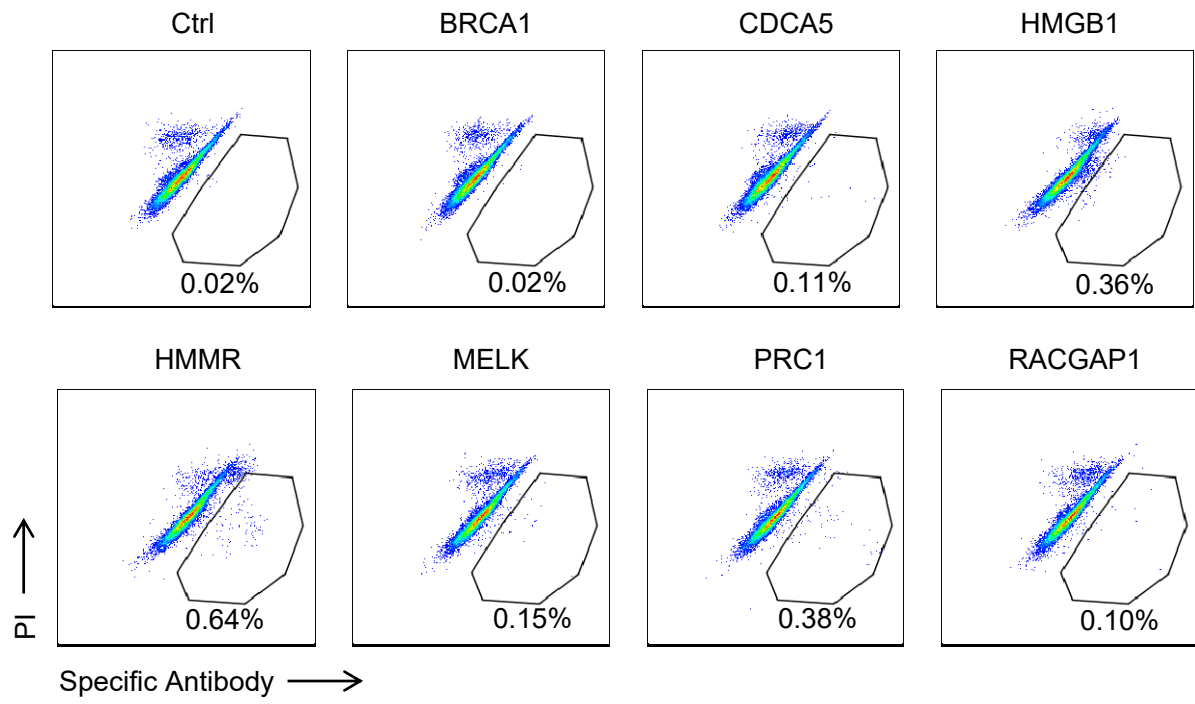

**Figure S11**

**A**

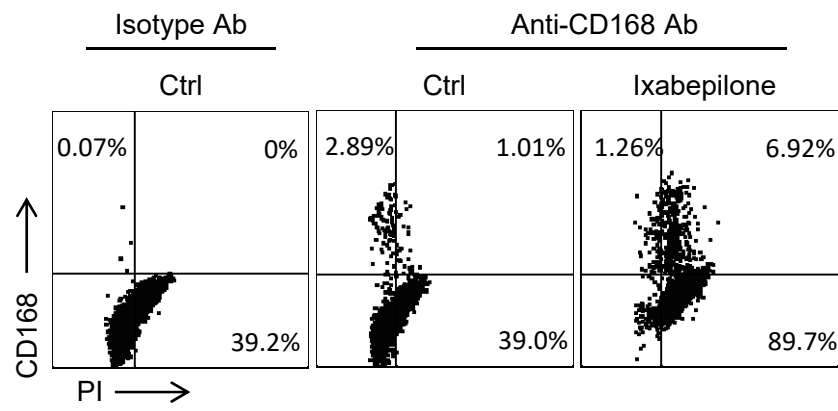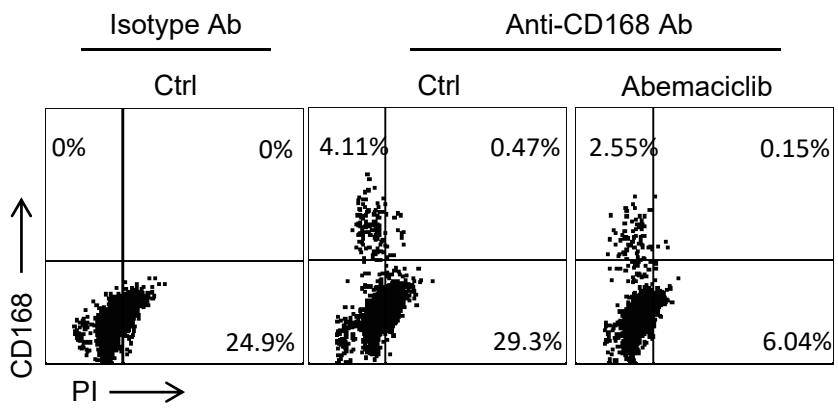

## Supplementary Figure Legends

### Fig S1.

The markers for MSC identification are analyzed by flow cytometry (gray shadow: isotype control, red line: marker of interest).

### Fig S2.

Consistent cDNA quality is verified by Agilent 2100 bioanalyzer.

### Fig S3.

WGCNA revealed key modules shown in heatmap, showing the significance of each module in each sub-cluster. Each cell contains the P value. Supplementary to Fig 1d.

### Fig S4.

Venn plot showing the overlapped genes among four datasets in blue and turquoise modules. Supplementary to Fig 1e.

### Fig S5.

Expression profile of featured genes shown as box plot. Supplementary to Fig 1f.

### Fig S6.

Unsupervised hierarchical gene clustering of MSCs with IFN $\gamma$  and TNF $\alpha$  pretreatment. Supplementary to Fig 2b.

### Fig S7.

WGCNA revealed key modules shown in heatmap, showing the significance of each module in each sub-cluster. Each cell contains the p value. Supplementary to Fig 2c-2d.

### Fig S8-9.

PCA analysis showing the clustering. Expression profile of featured genes (S7) and immune modulatory genes (S8), red to blue shows the level from high to low. Supplementary to Fig 2b-c.

### Fig S10.

Specific antibody staining of featured genes on the surface of UC-MSCs.

### Fig S11.

UC-MSCs were seeded to 80% consistency and treated with or without Ixabepilone (30nM) or Abemaciclib (4 $\mu$ M) for 36 hours. The DNA content and expression levels of CD168 were analyzed by flow cytometry after antibody and PI staining.

## Supplementary Table 1 Primer sequence

|           |                          |
|-----------|--------------------------|
| ACTB-F    | AGCCTCGCCTTTGCCGA        |
| ACTB-R    | GCGCGGCGATATCATCATC      |
| PRC1-F    | ATCACCTTCGGGAAATATGGGA   |
| PRC1-R    | TCTTTCTGACAGACGGATATGCT  |
| HMGB1-F   | TATGGCAAAGCGGACAAGG      |
| HMGB1-R   | CTTCGCAACATCACCAATGGA    |
| BRCA1-F   | GAAACCGTGCCAAAAGACTTC    |
| BRCA1-R   | CCAAGGTTAGAGAGTTGGACAC   |
| MELK-F    | TCTCCCAGTAGCATTCTGCTT    |
| MELK-R    | TGATCCAGGGATGGTTCAATAGA  |
| CDCA5-F   | GAGGTCCCAGCGGAAATCAG     |
| CDCA5-R   | TCTTTAAGACGATGGGCTTTCTG  |
| RACGAP1-F | ATGATGCTGAATGTGCGGAAT    |
| RACGAP1-R | CGCCAACCTGGATAAATTGGACTT |
| HMMR-F    | ATGATGGCTAAGCAAGAAGGC    |
| HMMR-R    | TTTCCCTTGAGACTCTTCGAGA   |
| MCM2-F    | ATGGCGGAATCATCGGAATCC    |
| MCM2-R    | GGTGAGGGCATCAGTACGC      |
| AURKB-F   | CAGAAGAGCTGCACATTTGACG   |
| AURKB-R   | CCTTGAGCCCTAAGAGCAGATTT  |
| CDK1-F    | GGATGTGCTTATGCAGGATTCC   |
| CDK1-R    | CATGTA CTGACCAGGAGGGATAG |

## Supplementary Table 2 Primer sequence for Fig 3H

|                |                           |
|----------------|---------------------------|
| hu-ANLN-F1     | TGCCAGGCGAGAGAATCTTC      |
| hu-ANLN-R1     | CGCTTAGCATGAGTCATAGACCT   |
| hu-ACTB-F      | AGCCTCGCCTTTGCCGA         |
| hu-ACTB-R      | GCGCGGCGATATCATCATC       |
| hu-Ang-1-F     | TCGTGAGAGTACGACAGACCA     |
| hu-Ang-1-R     | TCTCCGACTTCATGTTTTCCAC    |
| hu-ASF1B-F1    | TCCGGTTCGAGATCAGCTTC      |
| hu-ASF1B-R1    | GTCGGCCTGAAAGACAAACA      |
| hu-ASPM-F2     | TGCAGTGGGTGAACATGAAAA     |
| hu-ASPM-R2     | CGAAGAGGGTGTTACCTCGTTT    |
| hu-AURKA-F1    | GAGGTCCAAAACGTGTTCTCG     |
| hu-AURKA-R1    | ACAGGATGAGGTACACTGGTTG    |
| hu-AURKB-F3    | CAGAAGAGCTGCACATTTGACG    |
| hu-AURKB-R3    | CCTTGAGCCCTAAGAGCAGATTT   |
| hu-B7H4-F      | CTTCTGCCTCTCAGCCCTTA      |
| hu-B7H4-R      | GAAATAGTTCTGTAGATCCCTGTTG |
| hu-BIRC5-F1    | AGGACCACCGCATCTCTACAT     |
| hu-BIRC5-R1    | AAGTCTGGCTCGTTCTCAGTG     |
| hu-BMP2-F      | CCGACACTGAGACGCTGTTCCC    |
| hu-BMP2-R      | GACCTCGTCAGAGGGCTGGGAT    |
| hu-BUB1B-F1    | AAATGACCCTCTGGATGTTTGG    |
| hu-BUB1B-R1    | GCATAAACGCCCTAATTTAAGCC   |
| hu-BUB1-F1     | TGGGAAAGATACATACAGTGGGT   |
| hu-BUB1-R1     | AGGGGATGACAGGGTTCCAAT     |
| hu-C11orf82-F1 | AGTTTCAGATGCCAGTAACTTCT   |
| hu-C11orf82-R1 | AGTGATTGTTAGGTGCCTGAGA    |
| hu-C12orf48-F2 | TTGCTCAGGATTTGGATTTGAGG   |
| hu-C12orf48-R2 | TCAGTGGTGCTAAGAGCTACAA    |
| hu-CASC5-F1    | CTTCACACCGAGGACTCAAGA     |
| hu-CASC5-R1    | TTTGATGTGTAGAAGAGGCACTG   |
| hu-CCDC34-F1   | ACAGAAACAGGTGCGCTTACC     |
| hu-CCDC34-R1   | CAGCCGGTCACGTTCTTCTTT     |
| hu-CCL2-F      | GGCTGAGACTAACCCAGAAACA    |
| hu-CCL2-R      | GGAATGAAGGTGGCTGCTATGA    |
| hu-CCL5-F      | CTCCCCATATTCCTCGGACA      |
| hu-CCL5-R      | GTTGATGTACTIONCCGAACCC    |
| hu-CCNB1-F1    | AATAAGGCGAAGATCAACATGGC   |
| hu-CCNB1-F2    | TTTGTTACCAATGTCCCCAAGAG   |
| hu-CCNB2-F1    | CCGACGGTGTCCAGTGATTT      |
| hu-CCNB2-R1    | TGTTGTTTTGGTGGGTTGAACT    |
| hu-CCNE1-F     | AAGGAGCGGGACACCATGA       |
| hu-CCNE1-R     | ACGGTCACGTTTGCCTTCC       |

|                       |                         |
|-----------------------|-------------------------|
| hu-CCR10-F            | CTGCTGGATACTGCCGATCT    |
| hu-CCR10-R            | GCGTAGAGAACGGGATTGAG    |
| hu-CCR1-F             | ATGGAAACTCCAAACACCAC    |
| hu-CCR1-R             | GGAGGTAGATGCTGGTCATG    |
| hu-CCR2-F             | TTCTGGAGACCTCAACCCAATG  |
| hu-CCR2-R             | GGCGGAGATACAGGGCAACTAA  |
| hu-CCR3-F             | TGACGCCTAAGCTATCACTGGA  |
| hu-CCR3-R             | CCGGATAAGCACAGAAGACCA   |
| hu-CCR4-F             | AGAAGAAGAACAAGGCGGTGAA  |
| hu-CCR4-R             | CATGGTGGACTGCGTGTAAGAT  |
| hu-CCR5-F             | GTCCAATCTATGACATCA      |
| hu-CCR5-R             | GAATTGAGACTGACTGTA      |
| hu-CCR8-F             | TCCAGAACAAAGGCTGTCACTA  |
| hu-CCR8-R             | TTTGCACATTACAGTCCCAAAC  |
| hu-CD105(ENG)-F       | GGACGGTGACGGTGAAGGTGGA  |
| hu-CD105(ENG)-R       | TCTGGATCGGTGCGGGTGAGGT  |
| hu-CD29(Integrinb1)-F | TTCTGCACGATGTGATGATTTA  |
| hu-CD29(Integrinb1)-R | GTTCCCTTTGCTACGGTTGGTTA |
| hu-CD31(PECAM-1)-F    | GATCAGACGACCTCTAACGACC  |
| hu-CD31(PECAM-1)-R    | GCATAAGTAAGGCACCAGGAGTA |
| hu-CD34-F             | CTACAACACCTAGTACCCTTGGA |
| hu-CD34-R             | GGTGAACACTGTGCTGATTACA  |
| hu-CD44-F             | ACATCAGTCACAGACCTGCC    |
| hu-CD44-R             | GCAAACCTGCAAGAATCAAAGC  |
| hu-CD45(PTPRC)-F      | GGAGAAGTTAGTAAAACCGAATC |
| hu-CD45(PTPRC)-R      | TCTTATCAGACGAGGAACAATT  |
| hu-CD73(NT5E)-F       | GCCTGGGAGCTTACGATTTTG   |
| hu-CD73(NT5E)-R       | TAGTGCCCTGGTACTGGTCCG   |
| hu-CD90(THY1)-F       | ATGAAGGTCCTCTACTTATCCGC |
| hu-CD90(THY1)-R       | GCACTGTGACGTTCTGGGA     |
| hu-CDC20-F            | GCTTTGAACCTGAACGGTTTTG  |
| hu-CDC20-R            | TCTGGCGCATTTTTGTGGTTTT  |
| hu-CDC25C-F1          | TCTACGGAACCTTCTCATCCAC  |
| hu-CDC25C-R1          | TCCAGGAGCAGGTTTAACATTTT |
| hu-CDC45-F1           | TTCGTGTCCGATTTCCGCAA    |
| hu-CDC45-R1           | TGGAACCAGCGTATATTGCAC   |
| hu-CDCA3-F1           | AAGAGCGTCCCAGTCACAC     |
| hu-CDCA3-R1           | CCAGCACTAGGTGAACGGG     |
| hu-CDCA5-F1           | GAGGTCCCAGCGGAAATCAG    |
| hu-CDCA5-R1           | TCTTTAAGACGATGGGCTTTCTG |
| hu-CDCA8-F1           | GAAGGGCAGTAGTCGGGTG     |
| hu-CDCA8-R1           | TCACGGTCGAAGTCTTTCAGA   |
| hu-CDH1(E-Cad)-F      | CCAAAGCCTCAGGTCATAAACA  |
| hu-CDH1(E-Cad)-R      | TTGGGTCGTTGTACTGAATGGT  |

|                   |                           |
|-------------------|---------------------------|
| hu-CDH2(N-Cad)-F  | GACGGTTCGCCATCCAGAC       |
| hu-CDH2(N-Cad)-R  | TCGATTGGTTTGACCACGG       |
| hu-CDK1-F         | GGATGTGCTTATGCAGGATTCC    |
| hu-CDK1-R         | CATGTACTGACCAGGAGGGATAG   |
| hu-CDKN3-F1       | TCCGGGGCAATACAGACCAT      |
| hu-CDKN3-R1       | GCAGCTAATTTGTCCCGAAACTC   |
| hu-CENPF-F1       | CTCTCCCGTCAACAGCGTTC      |
| hu-CENPF-R1       | GTTGTGCATATTCTTGGCTTGC    |
| hu-CENPK-F2       | ATGGTACTGTCCACTAAGGAGTC   |
| hu-CENPK-R2       | TGTTTCATCCAACCACCGTTGT    |
| hu-CENPM-F1       | GCGGACTCGATGCTCAAAGA      |
| hu-CENPM-R1       | TTCTGGAGACTGTATTTGCTGTG   |
| hu-CEP55-F1       | AGTAAGTGGGGATCGAAGCCT     |
| hu-CEP55-R1       | CTCAAGGACTCGAATTTTCTCCA   |
| hu-CHAF1A-F1      | AGCCCGTCTGCCGTTTAAG       |
| hu-CHAR1A-R1      | AGAAGTACCCTGATCGTCTGAC    |
| hu-CKAP2L-F1      | GAGCCAAAACACCAAGCCTTA     |
| hu-CKAP2L-R1      | GGAGTTTAATGCTGATGGACCTT   |
| hu-CLSPN-F1       | AAGACAGTGATTCCGAAACAGAG   |
| hu-CLSPN-R1       | TGCGCTTCAAGATTTTCTGA      |
| hu-COX2(PTGS2)-F  | CTGGCGCTCAGCCATACAG       |
| hu-COX2(PTGS2)-R  | CGCACTTATACTGGTCAAATCCC   |
| hu-CX3CR1-F       | CAGCAAGAAGCCCAAGAGTGTC    |
| hu-CX3CR1-R       | GAAGAAGAAGGCGGTAGTGAAT    |
| hu-CXCL10-F       | GGCCATCAAGAATTTACTGAAAGCA |
| hu-CXCL10-R       | TCTGTGTGGTCCATCCTTGGAA    |
| hu-CXCL11-F       | ctggctgtgatattgtgtgc      |
| hu-CXCL11-R       | gggtacattatggaggctttc     |
| hu-CXCL12(SDF1)-F | ATGAACGCCAAGGTTCG         |
| hu-CXCL12(SDF1)-R | GGGCTACAATCTGAAGGG        |
| hu-CXCL1-F        | CCAAACCGAAGTCATAGCCACA    |
| hu-CXCL1-R        | CTTCTCCTAAGCGATGCTCAAA    |
| hu-CXCL3-F        | cactgttagggaagggaatg      |
| hu-CXCL3-R        | caagggaaagagaaacgc        |
| hu-CXCL9-F        | AAGCAGCCAAGTCGGTTAGTGG    |
| hu-CXCL9-R        | GATAAGACGTTCCGGTGGGATC    |
| hu-CXCR2-F        | CCCAGTCAGGATTTAAGTTTACC   |
| hu-CXCR2-R        | GACCAGCATCACGAGGGAGTTT    |
| hu-CXCR3-F        | AGTGCTAAATGACGCCGAGGTTG   |
| hu-CXCR3-R        | GGGCTCCTGCGTAGAAGTTGATG   |
| hu-CXCR4-F        | ACTACACCGAGGAAATGGGCT     |
| hu-CXCR4-R        | CCCACAATGCCAGTTAAGAAGA    |
| hu-CXCR5-F        | GCTGCTCCGTGCTTGTGTTGCTC   |
| hu-CXCR5-R        | TTGGCTGCTTGGCTTGAGTGGG    |



|                          |                          |
|--------------------------|--------------------------|
| hu-DEPDC1-F1             | TTTTGGTCCTGAAGTTACAAGGC  |
| hu-DEPDC1-R1             | TGGATACCTTCGTGGTAGAGTTT  |
| hu-DKK1-F                | GATCATAGCACCTTGGATGGG    |
| hu-DKK1-R                | GGCACAGTCTGATGACCGG      |
| hu-DLGAP5-F2             | TCCGACCTGGTCCAAGACAA     |
| hu-DLGAP5-R2             | GACGTGGGCATTACAGGCT      |
| hu-DTL-F2                | TCACTGGAATGCCGTCTTTGA    |
| hu-DTL-R2                | CTCACCAGCTTTTACGTCCC     |
| hu-E2F1-F                | ACGCTATGAGACCTCACTGAA    |
| hu-E2F1-R                | TCCTGGGTCAACCCCTCAAG     |
| hu-EGF-F                 | TGGATGTGCTTGATAAGCGG     |
| hu-EGF-R                 | ACCATGTCCTTTCCAGTGTGT    |
| hu-EPO-F                 | AGGCCCTGTTGGTCAACTCT     |
| hu-EPO-R                 | GCAGTGATTGTTCCGGAGTGGA   |
| hu-EREG-F                | GGACAGTGCATCTATCTGGTGG   |
| hu-EREG-R                | TTGGTGGACGGTTAAAAAGAAGT  |
| hu-ESCO2-F1              | CACTGGGACGCACCCAAAA      |
| hu-ESCO2-R1              | CACTTGCCTTGTCGCAAAG      |
| hu-EXO1-F1               | TGAGGAAGTATAAAGGGCAGGT   |
| hu-EXO1-R1               | AGTTTTTCAGCACAAAGCAATAGC |
| hu-FAM64A-F1             | CCTGGAAACGCCTGGAAAC      |
| hu-FAM64A-R1             | CAAAGCACTCTTAGCTGAGCG    |
| hu-FANCB-F1              | ATGAAGGATGGCCTAAGGGTC    |
| hu-FANCB-R1              | ACACACTAACAACCTTTGCCAGT  |
| hu-FANCD2-F1             | AAAACGGGAGAGAGTCAGAATCA  |
| hu-FANCD2-R1             | ACGCTCACAAGACAAAAGGCA    |
| hu-FANCI-F2              | GACGAGCTATTGGATGTTGTCA   |
| hu-FANCI-R2              | TTCACGAGTTCTCTGCCTAGT    |
| hu-FasL-F                | TCCCCAGGATCTGGTGATG      |
| hu-FasL-R                | TCAGCACTGGTAAGATTGAACAC  |
| hu-FGF2-F                | CAAGCTACAACCTTCAAGCAGAA  |
| hu-FGF2-R                | AAGAAACACTCATCCGTAACAC   |
| hu-FOXM1-F1              | CGTCGGCCACTGATTCTCAA     |
| hu-FOXM1-R1              | GGCAGGGGATCTCTTAGGTTC    |
| hu-Galectin-1 (LGALS1)-F | TCGCCAGCAACCTGAATCTC     |
| hu-Galectin-1 (LGALS1)-R | GCACGAAGCTCTTAGCGTCA     |
| hu-Galectin-3-F          | GTGAAGCCCAATGCAAACAGA    |
| hu-Galectin-3-R          | AGCGTGGGTAAAGTGGAAGG     |
| hu-GAPDH-F               | CTGGGCTACACTGAGCACC      |
| hu-GAPDH-F1              | CTGGGCTACACTGAGCACC      |
| hu-GDNF-F                | ACCTGGAGTTAATGTCCAACC    |
| hu-GDNF-R                | GGCATATTTGAGTCACTGCT     |
| hu-GINS2-F1              | CCCTGGTTTACCCGTGGAAG     |
| hu-GINS2-R1              | GGGAGCAGGCGACATTTCT      |

|                        |                         |
|------------------------|-------------------------|
| hu-GTSE1-F1            | CAGGGGACGTGAACATGGATG   |
| hu-GTSE1-R1            | ATGTCCAAAGGGTCCGAAGAA   |
| hu-HAS1-F              | GAGCCTCTTCGCGTACCTG     |
| hu-HAS1-R              | CCTCCTGGTAGGCGGAGAT     |
| hu-HGF-F               | TCACGAGCATGACATGACTCC   |
| hu-HGF-R               | AGCTTACTTGCATCTGGTTCC   |
| hu-HIST1H1B-F1         | CTAAGGAGCGCAATGGCCTTT   |
| hu-HIST1H1B-R1         | CTTCGGAGTCTTCTTCACTGC   |
| hu-HIST1H1E-F1         | CTGGGGAAGCCAAGCCTAAG    |
| hu-HIST1H1E-R1         | CTGCTTTTCGCCTTTTTTCGGG  |
| hu-HIST1H3C-F1         | GCTTGCTACTAAAGCAGCCC    |
| hu-HIST1H3C-R1         | AGCGCACAGATTGGTGTCTTC   |
| hu-HIST1H4C-F1         | GCAAAGGCGGAAAAGGCTTG    |
| hu-HIST1H4C-R1         | TAGCCGGTTTTTGAATGCCCT   |
| hu-HJURP-F1            | CCACGCTGACCTACGAGAC     |
| hu-HJURP-R1            | CTCACCGCTTTTTTGAATCGGC  |
| hu-HLA-IG-F            | CGCACAGACTGACAGAATGAACC |
| hu-HLA-IG-R            | CGAGGTAATCCTTGCCATCGTAG |
| hu-HLA-II-F            | TGGAAAGCACCTGTCTGTTG    |
| hu-HLA-II-R            | TGGTTGAGGTGCTGTGAGAG    |
| hu-HMGB2-F1            | CGGGGCAAATGTCCTCGTA     |
| hu-HMGB2-R1            | CGGAAGAGTCCGGGTGTTT     |
| hu-HMMR-F1             | ATGATGGCTAAGCAAGAAGGC   |
| hu-HMMR-R1             | TTTCCCTTGAGACTCTTCGAGA  |
| hu-HO-1-F              | GGGCCAGCAACAAAGTGCAAGA  |
| hu-HO-1-R              | GAGTGTAAGGACCCATCGGAGAA |
| hu-Hsp90ab1(Mm.2180)-F | CATCTCCATGATTGGGCAGTT   |
| hu-Hsp90ab1(Mm.2180)-R | CTTTGACCCGCCTCTCTTCTA   |
| hu-ICAM1-F             | gctatgccttgcctcttg      |
| hu-ICAM1-R             | atacacacacacacacacgc    |
| hu-IDO1-F              | CGGTCTGGTGTATGAAGGGT    |
| hu-IDO1-R              | TGGCTTGCAGGAATCAGGAT    |
| hu-IFNGR2-F1           | CTCCTCAGCACCCGAAGATTC   |
| hu-IFNGR2-R1           | GCCGTGAACCATTTACTGTCTG  |
| hu-IGF1-F              | GCTCTTCAGTTCGTGTGTGGA   |
| hu-IGF1-R              | GCCTCCTTAGATCACAGCTCC   |
| hu-IGF2-F              | GACTCGGCCTCTGGGAGGTTTA  |
| hu-IGF2-R              | ATTTGGCTCTTTGGGCTTCTGT  |
| hu-IL10-F              | TCAAGGCGCATGTGAACTCC    |
| hu-IL10-R              | GATGTCAAACACTCATGGCT    |
| hu-IL11-F              | CGAGCGGACCTACTGTCCTA    |
| hu-IL11-R              | GCCCAGTCAAGTGTCAGGTG    |
| hu-IL1B-F              | AGCTACGAATCTCCGACCAC    |
| hu-IL1B-R              | CGTTATCCCATGTGTCTGAAGAA |

|                  |                           |
|------------------|---------------------------|
| hu-IL6-F         | CACAGACAGCCACTCACCTC      |
| hu-IL6-R         | TTTTCTGCCAGTGCCTCTTT      |
| hu-IL8 (CXCL8)-F | TCAGTGAAGATGCCAGTGAAAC    |
| hu-IL8 (CXCL8)-R | ATCACATTCTAGCAAACCCATT    |
| hu-INHBA-F       | GGGGAGAACGGGTATGTGGAGA    |
| hu-INHBA-R       | AGAGGCGGATGGTGACTTTGGT    |
| hu-iNOS-F        | CCTGAGCTCTTCGAAATCCCA     |
| hu-iNOS-R        | CCCGAAACCACTCGTATTTGG     |
| hu-IQGAP3-F1     | GCAGCCTATGAACGCCTCA       |
| hu-IQGAP3-R1     | GGAGGGTGCAAACAGTGG        |
| hu-KGF(FGF7)-F   | GGGGATATAAGAGTGAGAAGA     |
| hu-KGF(FGF7)-R   | ATAGGAAGAAAGTGGGCTGTT     |
| hu-KIF14-F2      | TGTAGGTAGATTGGCACTTCAGA   |
| hu-KIF14-R2      | CGACGTTGTAATGTAAGACGTGT   |
| hu-KIF15-F2      | AGGAATCTGTATTCGCAACTGTG   |
| hu-KIF15-R2      | ACTTCGTGGGATTACTCCTCTC    |
| hu-KIF20B-F1     | CATCCTTGGTCCGTTAAGTGAA    |
| hu-KIF20B-R1     | CCTTCTGTGTAGTTGCTGGGC     |
| hu-KIF2C-F1      | CTGTTTCCCGGTCTCGCTATC     |
| hu-KIF2C-R1      | AGAAGCTGTAAGAGTTCTGGGT    |
| hu-KIF4A-F2      | TGTAGGTAGATTGGCACTTCAGA   |
| hu-KIF4A-R2      | CGACGTTGTAATGTAAGACGTGT   |
| hu-Klf4-F        | TACTTACTCGCCTTGCTGATTGTCT |
| hu-Klf4-R        | TGCTTGACGCAGTGTCTTCTCC    |
| hu-LIF-F         | GGCCCGGACACCCATAGACG      |
| hu-LIF-R         | CCACGCGCCATCCAGGTAAG      |
| hu-MAD2L1-F2     | GGACTCACCTTGCTTGTAAGTAC   |
| hu-MAD2L1-R2     | GATCACTGAACGGATTTTCATCCT  |
| hu-MCM10-F2      | CCCCTACAGACGATTTCTCGG     |
| hu-MCM10-R2      | CAGATGGGTTGAGTCGTTTCC     |
| hu-MCM2-F1       | ATGGCGGAATCATCGGAATCC     |
| hu-MCM2-R1       | GGTGAGGGCATCAGTACGC       |
| hu-MCM5-F1       | ATGTCGGGATTCGACGATCCT     |
| hu-MCM5-R1       | CCAGGTTGTAATGCCGCTTG      |
| hu-MCM8-F1       | AATGGAGAGTATAGAGGCAGAGG   |
| hu-MCM8-R1       | CAGAAGTACGTTTTCTGTGGT     |
| hu-MKI67-F1      | ACGCCTGGTTACTATCAAAGG     |
| hu-MKI67-R1      | CAGACCCATTTACTTGTGTTGGA   |
| hu-MMP2-F        | CAACTACGATGATGACCGCAAGT   |
| hu-MMP2-R        | GTCACAGTCCGCCAAATGAACC    |
| hu-MMP9-F        | TTCCAGTACCGAGAGAAAGCCTAT  |
| hu-MMP9-R        | GGTCACGTAGCCCACTTGGT      |
| hu-MYBL2-F1      | CCGGAGCAGAGGGATAGCA       |
| hu-MYBL2-R1      | CAGTGCGGTTAGGGAAGTGG      |

|                   |                          |
|-------------------|--------------------------|
| hu-Nanog-F        | atgcctcacacggagactgt     |
| hu-Nanog-R        | aagtgggtgtttgccttg       |
| hu-NCAPG2-F1      | TACAAGCCGTGTCTAAGGAGC    |
| hu-NCAPG2-R1      | TTGAGCCATGTTTCGGTTTCCA   |
| hu-NCAPG-F1       | GAGGCTGCTGTTCGATTAAGGA   |
| hu-NCAPG-R1       | AACTGTCTTATCATCCATCGTGC  |
| hu-NCAPH-F2       | AAACACGCAGATTACGGAACA    |
| hu-NCAPH-R2       | GTTGGTTGGTTCGGTGTCTTT    |
| hu-NDC80-F1       | CCTCTCCATGCAGGAGTTAAGA   |
| hu-NDC80-R1       | GGTCTCGGGTTCCTTGATTTTCT  |
| hu-NEIL3-F1       | TCTCCTGTTTTGGAAGTGCAG    |
| hu-NEIL3-R1       | CATTAGCACATCACCTAGCATCC  |
| hu-NEK2-F1        | TGCTTCGTGAACTGAAACATCC   |
| hu-NEK2-R1        | CCAGAGTCAACTGAGTCATCACT  |
| hu-nestin-F       | ATAGAGGGCAAAGTGGTAAGCAG  |
| hu-nestin-R       | TTCTAGTGTCTCATGGCTCTGGTT |
| hu-netrin1-F      | GACTTTGTCAATGCGGCCTTCGG  |
| hu-netrin1-R      | CGGGTTGTTGAGGTCGGTGAGG   |
| hu-NUF2-F1        | GGAAGGCTTCTTACCATTCAGC   |
| hu-NUF2-R1        | GACTTGTCCGTTTTGCTTTTGG   |
| hu-NUSAP1-F1      | AGCCCATCAATAAGGGAGGG     |
| hu-NUSAP1-R1      | ACCTGACACCCGTTTTAGCTG    |
| hu-Oct4-F         | GGGAGATTGATAACTGGTGTGTT  |
| hu-Oct4-R         | GTGTATATCCCAGGGTGATCCTC  |
| hu-PAQR4-F2       | GCTCTATCACCTCTTTATGTGCC  |
| hu-PAQR4-R2       | ACCCGACAACACAGTGTAGC     |
| hu-PBK-F1         | CCAAACATTGTTGGTTATCGTGC  |
| hu-PBK-R1         | GGCTGGCTTTATATCGTTCTTCT  |
| hu-PDGFA-F        | GCACTCGGTGAAGCAGTAAGAA   |
| hu-PDGFA-R        | TAAATACTACAGCGAGGAGGTG   |
| hu-PD-L1(CD274)-F | GCACTGACATTCATCTTCCGTTTA |
| hu-PD-L1(CD274)-R | CTCCCTGTTTGACTIONCATCTTT |
| hu-PD-L2-F        | TGGACTCACCTCTGGAGCCTAT   |
| hu-PD-L2-R        | GAGTTTGTGCGAAGCCCTGTCT   |
| hu-PLK1-F1        | CACCAGCACGTCGTAGGATTC    |
| hu-PLK1-R1        | CCGTAGGTAGTATCGGGCCTC    |
| hu-PLK4-F1        | AAGCTCGACACTTCATGCACC    |
| hu-PLK4-R1        | GCATTTTCAGTTGAGTTGCCAG   |
| hu-POLQ-F1        | CTGCGTCGGAGTGGGAAAC      |
| hu-POLQ-R1        | CTGTAGGCTTGCATTCTCCTG    |
| hu-PRC1-F1        | ATCACCTTCGGGAAATATGGGA   |
| hu-PRC1-R1        | TCTTTCTGACAGACGGATATGCT  |
| hu-PRR11-F2       | AAAGATGGACCCATGCAGATAAC  |
| hu-PRR11-R2       | TGCTTTCGGCGATGGTATAAG    |

|                             |                          |
|-----------------------------|--------------------------|
| hu-P-selectin-F             | CTACACCTGCTCCTGTTACCCT   |
| hu-P-selectin-R             | CCAACTAATGCAAATCCCTCTT   |
| hu-RACGAP1-F1               | ATGATGCTGAATGTGCGGAAT    |
| hu-RACGAP1-R1               | CGCCAACCTGGATAAATTGGACTT |
| hu-RAD51AP1-F1              | ATGACAAGCTCTACCAGAGAGAC  |
| hu-RAD51AP1-R1              | CACATTAGTGGTGACTGTTGGAA  |
| hu-RANKL(TNFSF11)-F         | CAACATATCGTTGGATCACAGCA  |
| hu-RANKL(TNFSF11)-R         | GACAGACTCACTTTATGGGAACC  |
| hu-RFC3-F1                  | GTGGACAAGTATCGGCCCTG     |
| hu-RFC3-R1                  | TGATGGTCCGTACACTAACAGAT  |
| hu-RRM2-F1                  | CACGGAGCCGAAAACCTAAAGC   |
| hu-RRM2-R1                  | TCTGCCTTCTTATACATCTGCCA  |
| hu-Semaphorin-3A(SEMA3A)-F  | GTGCCAAGGCTGAAATTATCCT   |
| hu-Semaphorin-3A(SEMA3A)-R  | CCCCTTGCATTCATCTCTTCT    |
| hu-SGOL1-F1                 | AACTCAGCAGTCACCTCATCT    |
| hu-SGOL1-R1                 | TGCACCTACGTTTAGGCAGAG    |
| hu-SHCBP1-F1                | GCTACCGTGATAAACCAGGTTC   |
| hu-SHCBP1-R1                | AGGCTCTGAATCGCTCATAGA    |
| hu-SKA1-F1                  | CCTGAACCCGTAAAGAAGCCT    |
| hu-SKA1-R1                  | TCATGTACGAAGGAACACCATTG  |
| hu-SKA3-F2                  | TGAGCGGTACATCGTATCCCA    |
| hu-SKA3-R2                  | GGGGTTACAATTACGGGCTCT    |
| hu-Sox2-F                   | ctccgggacatgatcagc       |
| hu-Sox2-R                   | ggtagtgctgggacatgtgaa    |
| hu-SPAG5-F2                 | CTGAGCAGTAGAACTGAGGCT    |
| hu-SPAG5-R2                 | TCCACATGATTGACACGGAAAT   |
| hu-SPC24-F1                 | GCCTTCCGCGACATAGAGG      |
| hu-SPC24-R1                 | CCTGCTCCTTCGCATTGAGA     |
| hu-SPC25-F1                 | ATGGTAGAGGACGAACTGGCA    |
| hu-SPC25-R1                 | AGGAGGTGTCCGTACTIONTTGAA |
| hu-ST3GAL2(SSEA4synthase)-F | AGGAGAATCCCTTGAACCGAGGAG |
| hu-ST3GAL2(SSEA4synthase)-R | CCATCATGCCCATTTCAGAACAAT |
| hu-TACC3-F1                 | TCGCCACCAGAAGTTACCG      |
| hu-TACC3-R1                 | TCCCGCAGAGGTGTCTGAAA     |
| hu-TGFa-F                   | AGGTCCGAAAACACTGTGAGT    |
| hu-TGFa-R                   | AGCAAGCGGTTCTTCCCTTC     |
| hu-TGFb-F                   | CAGCAACAATTCCTGGCGATACCT |
| hu-TGFb-R                   | AGCAGTGGGCGCTAAGGCGAAA   |

|                     |                           |
|---------------------|---------------------------|
| hu-TLR4-F           | ATGCTAAGGTTGCCGCTTTCAC    |
| hu-TLR4-R           | CTCCCAGCTTTCTGGTCTCACG    |
| hu-TMEM97-F1        | TACCCAGTCGAGTTTAGAAACCT   |
| hu-TMEM97-R1        | TGTCATGGTGTGAACAGAGTAGA   |
| hu-TOP2A-F1         | ACCATTGCAGCCTGTAAATGA     |
| hu-TOP2A-R1         | GGCGGAGCAAATATGTTCC       |
| hu-TP53-F           | GCTGCTCAGATAGCGATGGTCT    |
| hu-TP53-R           | TTGTAGTGGATGGTGGTACAGTCAG |
| hu-TP63-F           | ATTCAACGAGGGACAGATTGCC    |
| hu-TP63-R           | AACTTGCTGCTTTCTGATGCTAT   |
| hu-TP73-F           | TACCTGTCCACCCTGAGTCCAGT   |
| hu-TP73-R           | ACCATCCGCCTTCAAGATTTATTT  |
| hu-TPX2-F1          | ATGGAAGTGGAGGGCTTTTTTC    |
| hu-TPX2-R1          | TGTTGTCAACTGGTTTCAAAGGT   |
| hu-TRAIL(TNFSF10)-F | GCTCTGGGCCGCAAAT          |
| hu-TRAIL(TNFSF10)-R | TGCAAGTTGCTCAGGAATGAA     |
| hu-TRIP13-F1        | ACTGTTGCACTTCACATTTTCCA   |
| hu-TRIP13-R1        | TCGAGGAGATGGGATTTGACT     |
| hu-TSG6-F           | GGGCAGAGTTGGATACCCC       |
| hu-TSG6-R           | TGCGTGTGGGTTGTAGCAATA     |
| hu-UBE2C-F1         | GACCTGAGGTATAAGCTCTCGC    |
| hu-UBE2C-R1         | TTACCCTGGGTGTCCACGTT      |
| hu-VCAM1-F          | ACATGGAATTCGAACCCAAACA    |
| hu-VCAM1-R          | GGCTGACCAAGACGGTTGTATC    |
| hu-VEGFA-F          | ATGAACTTTCTGCTGTCTTGGGT   |
| hu-VEGFA-R          | TGGCCTTGGTGAGGTTTGATCC    |
| hu-VEGFB-F          | TAATGGGATTTGGGCTTTGGTA    |
| hu-VEGFB-R          | GCAGGAGGGCAGGCAGTCTGTA    |
| hu-VEGFC-F          | AGCACGAGCTACCTCAGCAAGA    |
| hu-VEGFC-R          | GCAGGGAACGTCTAATAATGGAA   |
| hu-VEGI(TNFSF15)-F  | ACCGAATGAACTATAACCAACAA   |
| hu-VEGI(TNFSF15)-R  | GCTACCTACTTCGCATACAGAC    |
| hu-WDHD1-F2         | GCTTCAGGTCGTCCTAGACAG     |
| hu-WDHD1-R2         | CCTTTGGGATGTTACAAGTGGT    |
| hu-ZWINT-F1         | AGGACACTGCTAAGGGTCTCG     |
| hu-ZWINT-R1         | GCCTCTACGTGCTCCCTGTA      |
